# Supplementary material
Source: publisher site journal article supplement (https://www.dovepress.com/article/599189)
Supplement: Supplementary file 1 [file 599189%20Supplementary%20Material.docx]

**Supplementary Material**

**SUPPLEMENTARY FIGURE S1 – CONDITIONAL RAI SCORES, BY ACUTE LEUKEMIA (SUB)TYPE (MULTINOMIAL LOGIT MODELS)**

**SUPPLEMENTARY FIGURE S2 – CONDITIONAL RAI SCORES, BY COUNTRY/REGION (MULTINOMIAL LOGIT MODELS)**
